# Supplementary material for: Effectiveness of instrumented gait analysis in interdisciplinary interventions on parents’ perception of family-centered service and on gross motor function in children with cerebral palsy: a randomized controlled trial
Source: Springer Nature journal article supplement (doi:10.1186/s12887-020-02315-2), 2020-09-01
Supplement: MOESM1 [file 18337870]

# Gait analysis report

CP in Motion

## Child's name

This report was prepared on the basis of a gait analysis that was carried out as part of the research project: "Individual multidisciplinary intervention". The report is prepared in English, but also includes a short summary in Danish containing the most important findings.

### The report describes:

- Body functions and structure impairments that are believed to affect walking.
- The elements of the child's gait (Features), where the movement pattern differs from the movement pattern in children without disabilities. The elements are documented as deviations in the course of the curve over movements of the pelvis, hip, knee and ankle.
- Additional information used in the interpretation of the survey results (e.g. physical examination, functional test and questionnaires).

### The report

The report contains the following sections:

- Relevant history and other measures
- Child's height, weight, walking speed, stride cadence, foot length (Orientation)
- Gait index describing movements' deviation from gait in children without disabilities (GDI, GPS and GVS).
- Description of the quality of the study (Quality)
- Comparison of study findings and supplementary information, as well as interpretation of impairments affecting time (Evidence and interpretation)
- Graphs of the child's movements during the course of marking survey findings (Gait Data and Consistency plots)
- Description of survey findings (Description)
- The physical examination and information on walking speed, stride length etc. (Physical examination and temporal-spatial parameters).
- Results of functional tests and questionnaires (Other measures)

The report will be conferred interdisciplinary as part of a research project. Thereafter, on the basis of the examination findings, an overall description of relevant contributions that health personnel are recommended to consider, will be prepared.

Physiotherapist Helle Mätzke Rasmussen

Gait Analysis Laboratory – The Orthopedic Research Unit, University of Southern Denmark & Odense University Hospital

Kontakt: xxx@xxx.xx / +45 xx xx xx xx

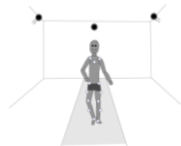

|            |            |
|------------|------------|
| Projekt ID | xxxx       |
| Dato       | xx-xx-xxxx |

# Gait analysis report

CP in Motion

## Patient details

|          |                           |       |    |      |            |
|----------|---------------------------|-------|----|------|------------|
| Name     | xxx                       | Age   | x  | Date | xx-xx-xxxx |
| Diagnose | Unilateral CP, right side | GMFCS | II | FMS  | 5 – 5 – 5  |

## Findings

|                                                                                                                                                                   |                 |                          |
|-------------------------------------------------------------------------------------------------------------------------------------------------------------------|-----------------|--------------------------|
| The most likely impairments affecting the walking patten are:                                                                                                     |                 |                          |
| <b>Impairment</b>                                                                                                                                                 | <b>Evidence</b> | <b>Effect on walking</b> |
| - Reduced ROM in ext. in right knee                                                                                                                               | Clear           | Major                    |
| - Reduced strength around right ankle                                                                                                                             | Clear           | Major                    |
| - Reduced ROM in dorsal flexion on right                                                                                                                          | Probable        | Moderate                 |
| - Leg length discrepancy                                                                                                                                          | Possible        | Minor                    |
| <b>Comments</b>                                                                                                                                                   |                 |                          |
| - All gait features have been attributed to the impairments listed above.                                                                                         |                 |                          |
| Video analysis with orthotics                                                                                                                                     |                 |                          |
| - In the video where the child walks with drop foot brace / orthotics, gait is more secure and faster. Furthermore the child walks with heel strike on both feet. |                 |                          |



|            |            |
|------------|------------|
| Projekt ID | xxxx       |
| Dato       | XX-XX-XXXX |

## Notes on reading this report

The rest of this report outlines the evidence in support of the findings listed above. The Orientation and Quality sections should be read first as they may contain information that is pertinent to how the data is interpreted. For each of the impairments identified there is a box in the Evidence section that lists gait features and elements of the clinical exam and other data that have been linked to that specific impairment. The final section outlines the symbols used to mark up specific features on the gait graphs. The report should be read alongside a version of the data on which the features have been marked.

The report is based on the first of two clinical gait analysis, that have been performed as part of a research project, that is conducted at the Gait Analysis Laboratory by physiotherapist Helle Mätzke Rasmussen.

## History

|                         |                                                                                                                                                                                                                                                                                                                                                             |
|-------------------------|-------------------------------------------------------------------------------------------------------------------------------------------------------------------------------------------------------------------------------------------------------------------------------------------------------------------------------------------------------------|
| <b>Relevant history</b> | <p>The child is followed in the Cerebral Palsy Follow-up program at XXX and by PT XXX</p> <p>The child walks with a drop-foot orthotic, that he/she is pleased with.</p> <p>The child has a lumbar scoliosis.</p> <p>The child's mother tells that the child's goal is to learn to ride a 2-wheel bicycle.</p>                                              |
| <b>Other measures</b>   | <p>1-min walk test: 80 meter</p> <p>GMFM-66 Score: 80 point 75,4-84,6 (95% CI)</p> <p>PODCI Global functioning Scale: 73 (1-100)</p> <p>PEDI: Functional skills: 56 (0-59), Caregiver assistance: 32 (0-35)</p> <p>PedsQL: 44 – 70 (0-100)</p> <p>Fatigue / Speech and communication 44</p> <p>Movement and balance: 70</p> <p>MPOC-20: 3,3 – 4,6 (0-7)</p> |



|            |            |
|------------|------------|
| Projekt ID | xxxx       |
| Dato       | XX-XX-XXXX |

## Orientation

|        |        |                                                                                                                                  |      |                 |      |
|--------|--------|----------------------------------------------------------------------------------------------------------------------------------|------|-----------------|------|
| Height | 1,30 m | Speed                                                                                                                            | 90 % | Step length (L) | 85 % |
| Weight | 26 Kg  | Cadence                                                                                                                          | 93 % | Step length (R) | 91 % |
| BMI    | 15     | Spatial gait parameters and expressed as % of those for children with no neuromuscular pathology (not normalised to leg length). |      |                 |      |

### Gait Indices

|                    |      |     |             |      |                 |                      |
|--------------------|------|-----|-------------|------|-----------------|----------------------|
| GDI Left and right | 70   | 76  | GDI Overall | 73   | GVS scores      | Left Right / Overall |
| GPS Left and right | 11,4 | 9,9 | GPS Overall | 11,4 | Pelvic Ant tilt | 4,0                  |

### Motion Analysis Profile

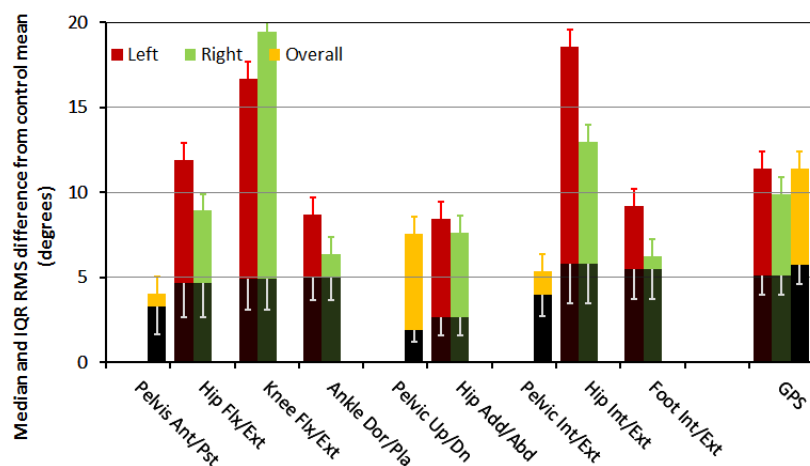

|                |      |      |
|----------------|------|------|
| Hip flex       | 11,9 | 8,9  |
| Knee flex      | 16,7 | 19,4 |
| Ankle flex     | 8,7  | 6,3  |
| Pelvic obl up  | 7,6  |      |
| Hip add        | 8,4  | 7,6  |
| Pelvic int rot | 5,3  |      |
| Hip int rot    | 18,6 | 13,0 |
| Foot prog      | 9,2  | 6,5  |

### Comments on video

- The child stands with weight bearing primarily on her left leg and with the right leg in slight flexion. Leg length discrepancy is visual on the frontal video in stance, in both knee and pelvic. Visually it seems more pronounced than the measured 1.5 cm.
- The child walks a bit unsecure, which is seen in the end of the frontal video, where she/he changes direction and loses balance. The child walks with the leg in adduction and often crosses the midline. The child holds his/her right arm in a position with light flexion in the elbow. When the child walks with shoes and orthotics, gait is more secure and faster. Furthermore the child walks with heel strike.

## Quality

Is the data likely to be representative of the subject's usual walking pattern?

- The child's mother confirms that the walking pattern is representative of the normal walking pattern

Are there any concerns regarding consistency of traces?

- No, but there is some inconsistency in the transverse plane.

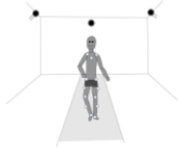

|            |            |
|------------|------------|
| Projekt ID | xxxx       |
| Dato       | xx-xx-xxxx |

Is there any evidence of measurement artefact or inconsistency in the data?

- No



|            |            |
|------------|------------|
| Projekt ID | xxxx       |
| Dato       | xx-xx-xxxx |

## Evidence and interpretation

|                                                                                                                                                                                                                                                                                                                                                                                                                                                                          |                                                                                                                                                                                                                                                                                                                                                                                                                                                                                                                                                                                                                       |                          |
|--------------------------------------------------------------------------------------------------------------------------------------------------------------------------------------------------------------------------------------------------------------------------------------------------------------------------------------------------------------------------------------------------------------------------------------------------------------------------|-----------------------------------------------------------------------------------------------------------------------------------------------------------------------------------------------------------------------------------------------------------------------------------------------------------------------------------------------------------------------------------------------------------------------------------------------------------------------------------------------------------------------------------------------------------------------------------------------------------------------|--------------------------|
| <b>Impairment:</b> Reduced ext. ROM in right knee                                                                                                                                                                                                                                                                                                                                                                                                                        | Evidence: Clear                                                                                                                                                                                                                                                                                                                                                                                                                                                                                                                                                                                                       | Effect on walking: Major |
| <b>Impairment:</b> Leg length discrepancy                                                                                                                                                                                                                                                                                                                                                                                                                                | Evidence: Possible                                                                                                                                                                                                                                                                                                                                                                                                                                                                                                                                                                                                    | Effect on walking: Minor |
| <b>Features:</b><br><b>h</b> Abnormal slope in knee extension right<br><b>a</b> Too much anterior pelvic tilt<br><b>d</b> Too little hip extension (right)<br><b>j</b> Too little right dorsiflexion in midstance<br><b>e</b> Too much right hip flexion in swing<br><b>f</b> Too much right hip ext. rotation in swing<br><b>l</b> Increased int. foot progression<br><b>b</b> Decreased pelvic obliquity (right down)<br><b>c</b> Increased right pelvic ext. rotation | <b>Comments:</b><br>Too much anterior pelvic tilt (a), too little hip ext. in stance (d) and too little right dorsiflexion in stance (d) might be a compensatory effect of the lack of knee extension on right (h).<br><br>Too much right hip flexion (e) and ext. rotation in swing (f) might be to clear left foot, in compensation for the flexion in the right leg (h, d, i) in stance and leg length discrepancy. To keep the foot aligned the foot is internal rotated (l). Furthermore the decreased pelvic obliquity (b), and increased right pelvic ext. rotation (c) might compensation for the difference. |                          |
| <b>Supplementary data:</b>                                                                                                                                                                                                                                                                                                                                                                                                                                               | <b>Left</b>                                                                                                                                                                                                                                                                                                                                                                                                                                                                                                                                                                                                           | <b>Right</b>             |
| Knee extension                                                                                                                                                                                                                                                                                                                                                                                                                                                           | 0°                                                                                                                                                                                                                                                                                                                                                                                                                                                                                                                                                                                                                    | -8°                      |
| Quadriceps lag (difference)                                                                                                                                                                                                                                                                                                                                                                                                                                              | 0°                                                                                                                                                                                                                                                                                                                                                                                                                                                                                                                                                                                                                    | 0°                       |
| Knee ext. strength                                                                                                                                                                                                                                                                                                                                                                                                                                                       | 5                                                                                                                                                                                                                                                                                                                                                                                                                                                                                                                                                                                                                     | 4+                       |
| Leg length                                                                                                                                                                                                                                                                                                                                                                                                                                                               | 63.5                                                                                                                                                                                                                                                                                                                                                                                                                                                                                                                                                                                                                  | 62.0                     |

|                                                                                                                                                                                                                                                                                                         |                                                                                                                                                                                                                                                                                                 |                             |
|---------------------------------------------------------------------------------------------------------------------------------------------------------------------------------------------------------------------------------------------------------------------------------------------------------|-------------------------------------------------------------------------------------------------------------------------------------------------------------------------------------------------------------------------------------------------------------------------------------------------|-----------------------------|
| <b>Impairment:</b> Reduced strength around right ankle                                                                                                                                                                                                                                                  | Evidence: Clear                                                                                                                                                                                                                                                                                 | Effect on walking: Major    |
| <b>Impairment:</b> Reduced range of movement right                                                                                                                                                                                                                                                      | Evidence: Probable                                                                                                                                                                                                                                                                              | Effect on walking: Moderate |
| <b>Features:</b><br><b>k</b> Too little dorsiflexion in swing and ini. contact<br><b>i</b> Too much left knee flexion in early stance<br><b>j</b> Too little right dorsiflexion in midstance<br><b>c</b> Increased pelvic rotation<br><b>g</b> Too much knee flexion in late swing and initial contact. | <b>Comments:</b><br>Too little dorsiflexion in swing (k) is seen due to reduced strength in dorsiflexion, which causes the increased knee flexion in late swing (i). The decrease in dorsiflexion in midstance (j) might also be due to decreased range of movement in dorsiflexion (8° / 10°). |                             |
| <b>Supplementary data:</b>                                                                                                                                                                                                                                                                              | <b>Left</b>                                                                                                                                                                                                                                                                                     | <b>Right</b>                |
| Plantar flexor spasticity                                                                                                                                                                                                                                                                               | 15°                                                                                                                                                                                                                                                                                             | 5°                          |
| Dorsiflexion (knee 90°)                                                                                                                                                                                                                                                                                 | 15°                                                                                                                                                                                                                                                                                             | 8°                          |
| Dorsiflexion (knee 0°)                                                                                                                                                                                                                                                                                  | 20°                                                                                                                                                                                                                                                                                             | 10°                         |
| Dorsi flexor strength                                                                                                                                                                                                                                                                                   | 5                                                                                                                                                                                                                                                                                               | 4                           |
| Plantar flexor strength                                                                                                                                                                                                                                                                                 | 5                                                                                                                                                                                                                                                                                               | 4                           |

The report is based on a clinical gait analysis, that have been performed as part of a research project, that is conducted at the Gait Analysis Laboratory by physiotherapist Helle Mätzke Rasmussen.

HMR / xxxx-xx-xx / Based on a template by Baker, McGinley and Thomason (2010)

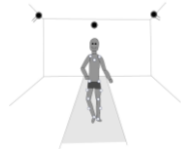

|            |            |
|------------|------------|
| Projekt ID | xxxx       |
| Dato       | XX-XX-XXXX |

## Gait data

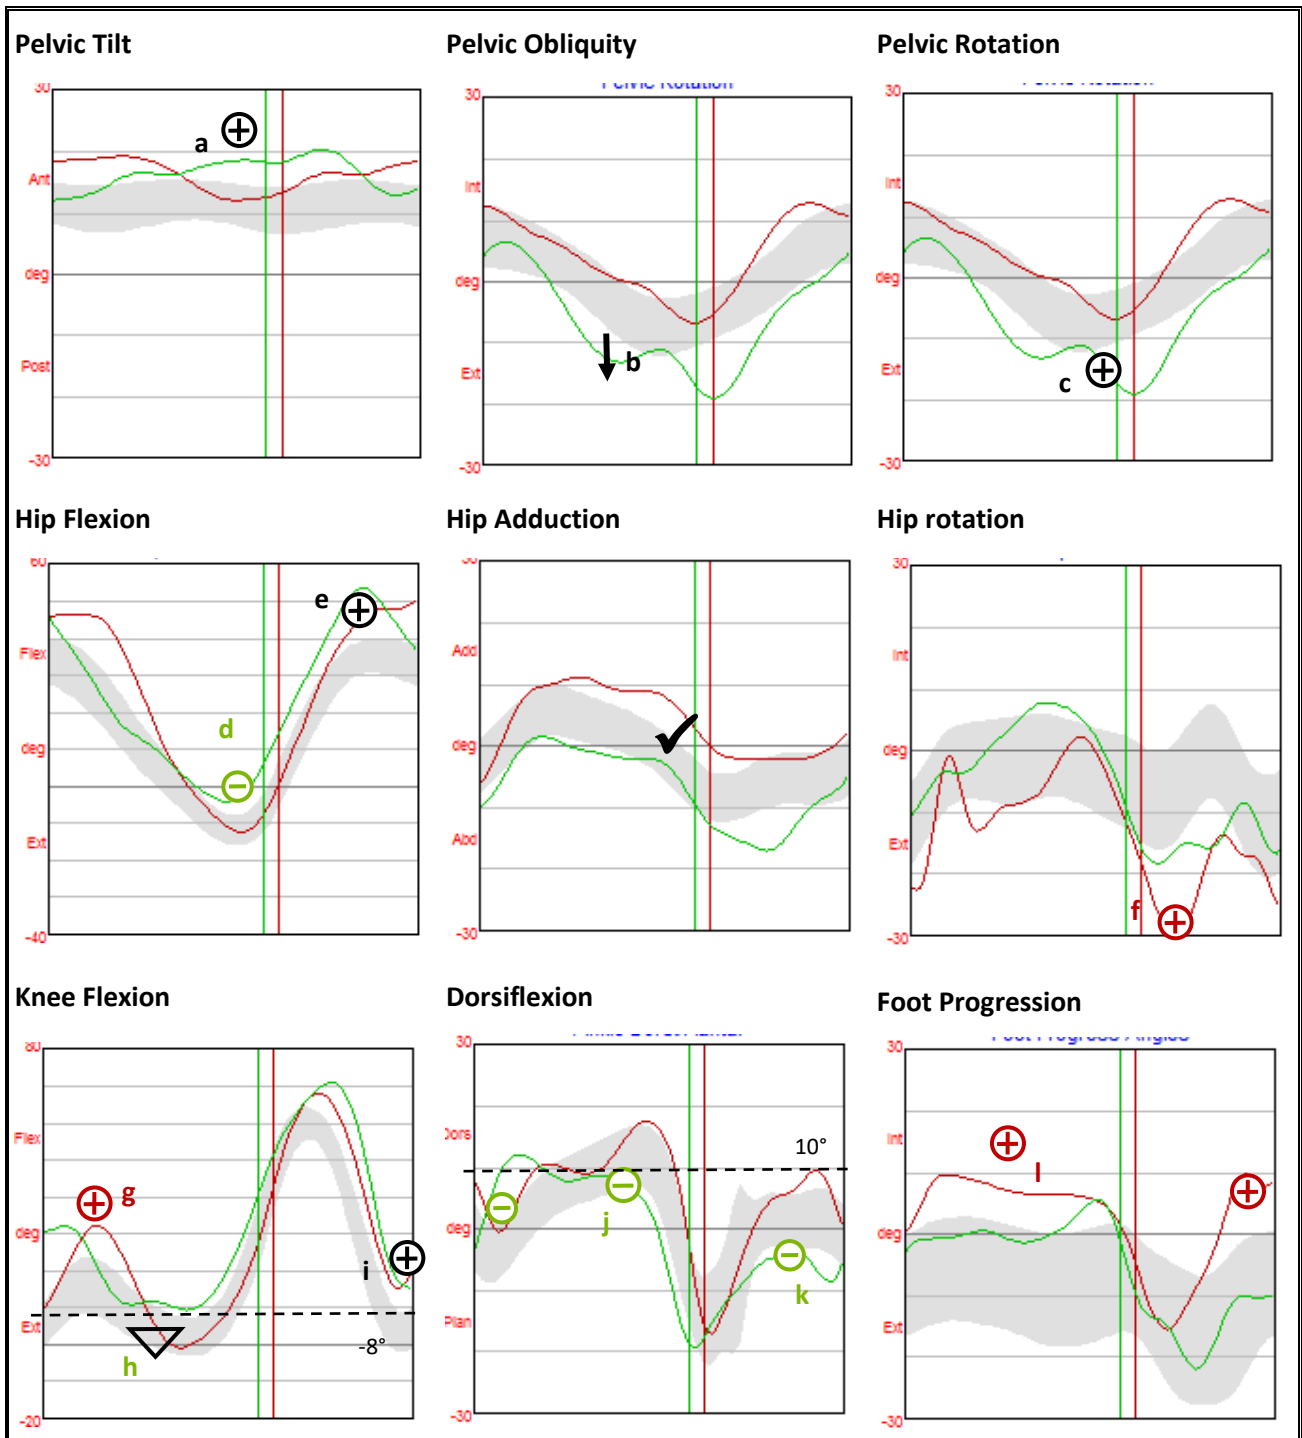

The report is based on a clinical gait analysis, that have been performed as part of a research project, that is conducted at the Gait Analysis Laboratory by physiotherapist Helle Mätzke Rasmussen.

HMR / xxxx-xx-xx / Based on a template by Baker, McGinley and Thomason (2010)

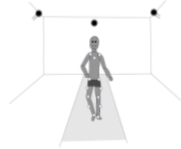

|            |            |
|------------|------------|
| Projekt ID | xxxx       |
| Dato       | XX-XX-XXXX |

## Consistency plots

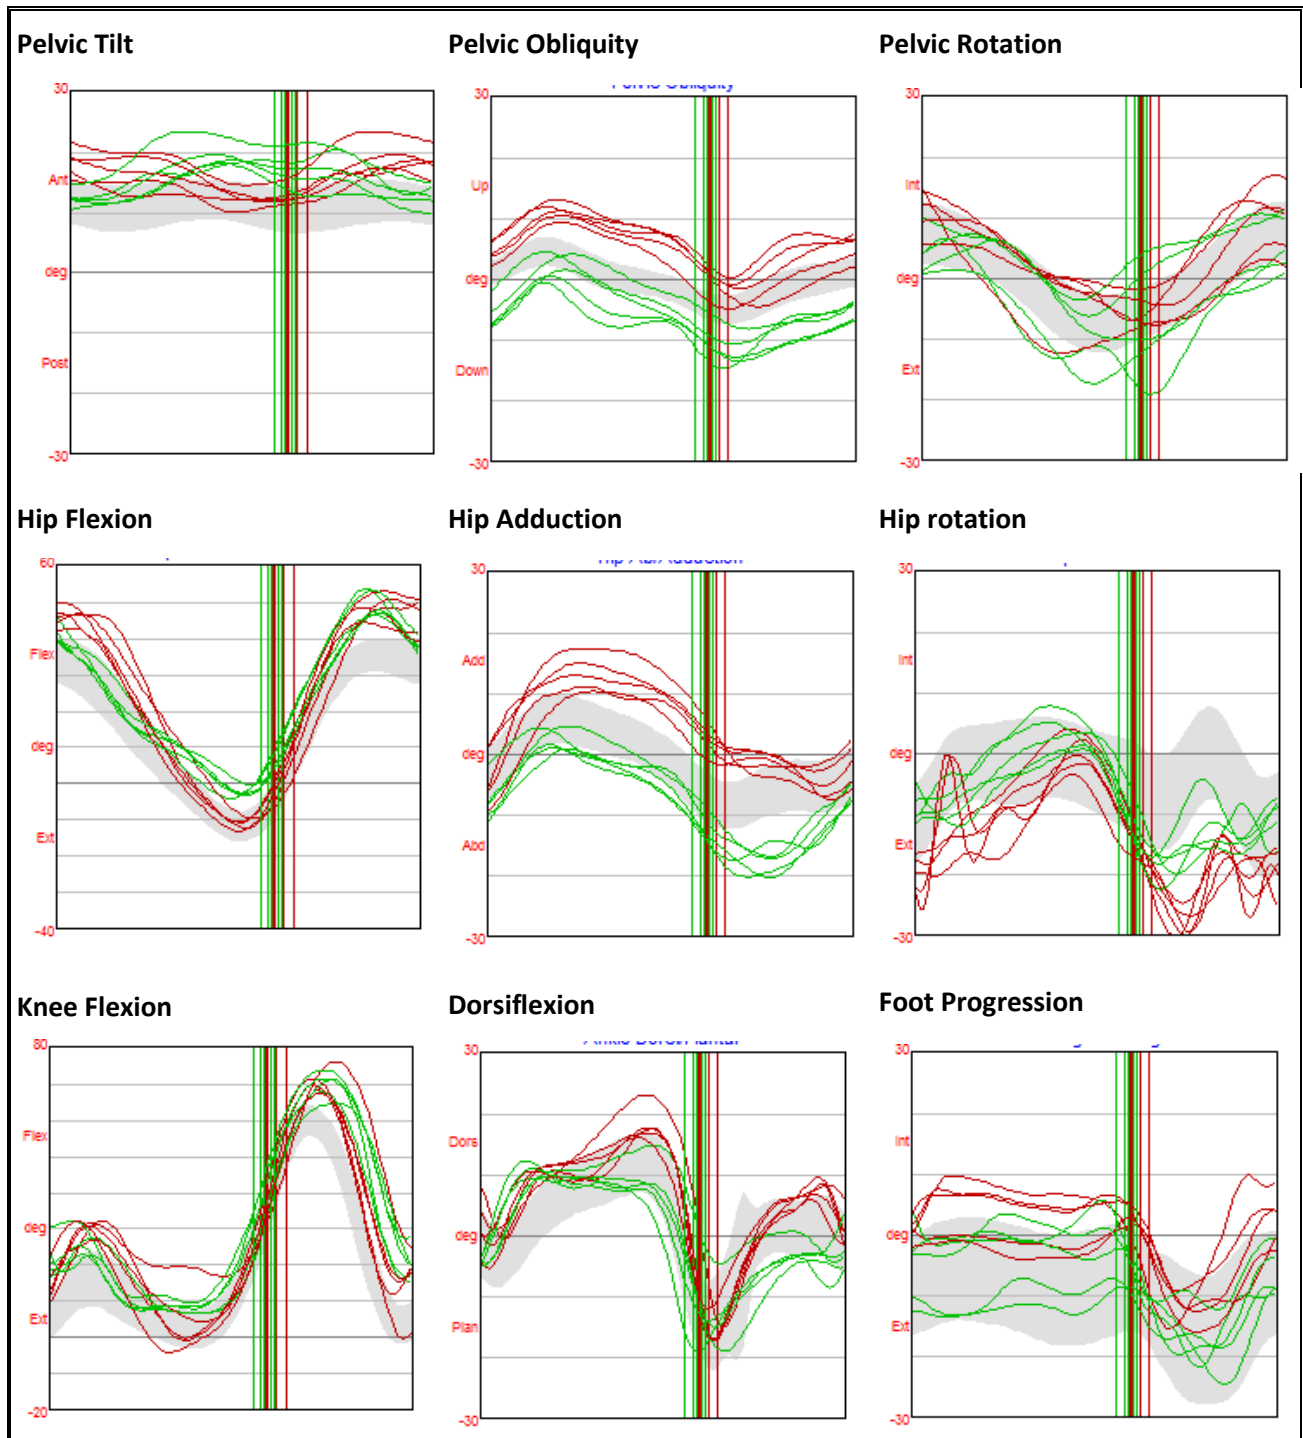

The report is based on a clinical gait analysis, that have been performed as part of a research project, that is conducted at the Gait Analysis Laboratory by physiotherapist Helle Mätzke Rasmussen.

HMR / xxxx-xx-xx / Based on a template by Baker, McGinley and Thomason (2010)



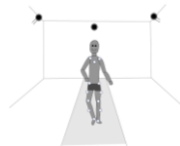

|            |            |
|------------|------------|
| Projekt ID | xxxx       |
| Dato       | xx-xx-xxxx |

## Description

| Letter   | Type           | Side  | Variable             | Timing                               |
|----------|----------------|-------|----------------------|--------------------------------------|
| <b>a</b> | Too much       | Right | Pelvic ant tilt      | Late stance and initial swing        |
| <b>b</b> | Decreased      | Right | Pelvic up obliquity  | All of cycle (Right: down, left up)  |
| <b>c</b> | Increased      | Right | Pelvic ext. rotation | Late stance and swing (inconsistent) |
| <b>d</b> | Too little     | Left  | Hip extension        | Initial stance and late swing        |
| <b>e</b> | Too much       | Both  | Hip flexion          | Late swing and initial stance (left) |
| <b>f</b> | Too much       | Right | Hip ext. rotation    | Swing                                |
| <b>g</b> | Too much       | Left  | Knee flexion         | Early stance                         |
| <b>h</b> | Abnormal slope | Right | Knee flexion         | Mid-stance                           |
| <b>i</b> | Too much       | Both  | Knee Flexion         | Late swing and initial contact       |
| <b>j</b> | Too little     | Right | Dorsiflexion         | Midstance                            |
| <b>k</b> | Too little     | Right | Dorsiflexion         | Swing and initial contact            |
| <b>l</b> | Too much       | Right | Foot progression     | Stance and late swing (inconsistent) |



|            |            |
|------------|------------|
| Projekt ID | xxxx       |
| Dato       | XX-XX-XXXX |

## Physical examination and temporal-spatial parameters

| Hip                              | Left | Right |
|----------------------------------|------|-------|
| Hip ext. range (Thomas test)     | 12°  | 15°   |
| Hip flexor strength              | 5    | 4+    |
| Hip ext. strength                | 5    | 4+    |
| Hip abd. range (hip 0° knee 0°)  | 45°  | 45°   |
| Hip abd. range (hip 0° knee 90°) | 45°  | 45°   |
| Hip abd. strength                | 5    | 4+    |
| Hip add. tone (MAS)              | -    | -     |
| Hip int. rotation range          | 40°  | 50°   |
| Hip ext. rotation range          | 40°  | 35°   |

| Knee                                   | Left | Right |
|----------------------------------------|------|-------|
| Mod. Popliteal angle (m. flex hip)     | 150° | 155°  |
| True popliteal angle                   | 150° | 140°  |
| Hamstring shift                        | 0°   | 15°   |
| Hamstring spasticity (Tardieu)         | -    | -     |
| Hamstring spasticity (MAS)             | -    | -     |
| Knee extension                         | 0°   | -8°   |
| Quadriceps lag (active)                | 0°   | -5°   |
| Quadriceps lag (passive)               | 0°   | -5°   |
| Knee extensor strength (90-20° flex)   | 5    | 4+    |
| Rectus length (Ely)                    | 140° | 140°  |
| Rectus spasticity (Fast Ely – Tardieu) | -    | -     |
| Rectus spasticity (Fast Ely – MAS)     | -    | -     |
| Knee flex. strength                    | 5    | 4+    |

| Ankle                               | Left | Right |
|-------------------------------------|------|-------|
| Dorsiflexion (knee 90°) Soleus      | 15°  | 8°    |
| Dorsiflexion (knee 0°) Gastroc.     | 20°  | 10°   |
| Plantar flexor tone (MAS)           | -    | -     |
| Plantar flexor spasticity (Tardieu) | 15°  | 5°    |

|                                  | Left | Right |
|----------------------------------|------|-------|
| Plantar flexor strength          | 5    | 4     |
| Dorsi flexor strength (knee 90°) | 5    | 4     |
| Inventor strength                | 4    | 3     |
| Evertor strength                 | 4    | 3     |
| Confusion test                   | -    | +     |

| Other measure   | Left | Right |
|-----------------|------|-------|
| Tibial torsion  | 6°   | 20°   |
| Posture of feet | -    | -     |

|                                            | Left | Right |
|--------------------------------------------|------|-------|
| Leg length (cm)                            | 63,5 | 62,0  |
| Knee valgus / varus ( <i>if relevant</i> ) | -    | -     |



|            |            |
|------------|------------|
| Projekt ID | xxxx       |
| Dato       | xx-xx-xxxx |

### Tibial torsion and foot alignment

|                                                                                   |    |
|-----------------------------------------------------------------------------------|----|
| <b>Left</b>                                                                       |    |
|  |    |
| Tibial torsion                                                                    | 6° |
| Thigh-hindfoot angle                                                              | 2° |

|                                                                                    |     |
|------------------------------------------------------------------------------------|-----|
| <b>Right</b>                                                                       |     |
|  |     |
| Tibial torsion                                                                     | 20° |
| Thigh-hindfoot angle                                                               | 22° |

### Spatial gait parameters

|                          |                |
|--------------------------|----------------|
| Walking speed            | 1.22 m/s       |
| Cadance                  | 129.5 Step/min |
| Stride length            | 1.05 m         |
| <b>Left</b> step length  | 0.45 m         |
| <b>Right</b> step length | 0.48 m         |
| <b>Left</b> step with    | 0.06 m         |
| <b>Right</b> step with   | 0.05 m         |

|                          |             |
|--------------------------|-------------|
| Walking speed            | 93 % normal |
| Cadance                  | 91 % normal |
| Stride length            | 97 % normal |
| <b>Left</b> step length  | 85 % normal |
| <b>Right</b> step length | 91 % normal |
| <b>Left</b> step with    | 62 % normal |
| <b>Right</b> step with   | 91 % normal |

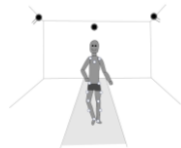

|            |            |
|------------|------------|
| Projekt ID | xxxx       |
| Dato       | xx-xx-xxxx |

## Abbreviation

|         |                                               |
|---------|-----------------------------------------------|
| Na      | Not available                                 |
| la      | Nothing abnormal                              |
| GMFM-66 | Gross Motor Function Measure, 66 item version |
| PODCI   | Pediatric Outcomes Data Collection Instrument |
| PEDI    | Pediatric Evaluation Disability Inventory     |
| MPOC-20 | Measure of Processes of Care, 20 item version |

## Feature symbols

|  |                             |  |                               |                                            |
|--|-----------------------------|--|-------------------------------|--------------------------------------------|
|  | Increased<br>(all of cycle) |  | Decreased<br>(all of cycle)   | Arrow ending on trace                      |
|  | Too much<br>(part of cycle) |  | Not enough<br>(part of cycle) | On trace (or just above or below feature)  |
|  | Too early                   |  | Too late                      | Arrow ending on feature                    |
|  | Too long                    |  | Too short                     | Arrow spanning feature                     |
|  | Increased range             |  | Decreased range               | Adjust height and width as appropriate     |
|  | or                          |  | Abnormal slope                | Sloping side along feature                 |
|  | Within normal limits        |  |                               | Only use if particular reason for doing so |
|  | Possible artefact           |  |                               | On feature                                 |
|  | Other feature               |  |                               | Encircling feature                         |

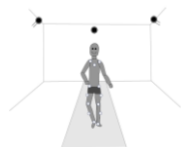

|            |            |
|------------|------------|
| Projekt ID | xxxx       |
| Dato       | xx-xx-xxxx |

## Other measures

|                |                                                                                                                                                                                                                                                                                         |
|----------------|-----------------------------------------------------------------------------------------------------------------------------------------------------------------------------------------------------------------------------------------------------------------------------------------|
| <b>GMFM-66</b> | <p><b>GMFM Score estimated with Gross Motor Ability Estimator 2 (0-100)</b></p> <p>19 item tested - GMFM-66: 80 point<br/>95% Confidence interval: 75,4 – 84,6</p>                                                                                                                      |
| <b>PODCI</b>   | <p><b>PODCI standardized mean subscales (0-100)</b></p> <p>Global functioning Scale: 73<br/>Upper Extremity Scale: 75<br/>Transfer &amp; Basic Mobility Scale: 95<br/>Sports and Physical Functioning Scale: 72<br/>Pain/Comfort: 49<br/>Happiness: 70</p>                              |
| <b>PEDI</b>    | <p><b>PEDI Subscale: Functional mobility (0-59 / 0-35)</b></p> <p>Functional skills: 56<br/>Caregiver assistance: 32</p>                                                                                                                                                                |
| <b>PedsQL</b>  | <p><b>PedsQL Subscales (0-100)</b></p> <p>Daily Activities: 67<br/>School Activities: 56<br/>Movement and Balance: 70<br/>Pain and Hurt: 56<br/>Fatigue: 44<br/>Eating Activities: 65<br/>Speech and Communication: 44</p>                                                              |
| <b>MPOC-20</b> | <p><b>MPOC-20 Categories (0-7)</b></p> <p>Enabling and Partnership: 3,3<br/>Providing General Information: 4,2<br/>Coordinated and Comprehensive Care for the Child and Family: 3,7<br/>Providing Specific Information about the Child: 3,8<br/>Respectful and Supportive Care: 4,6</p> |

# Interdisciplinary interventions

CP in Motion

## ‘Child’s name’

This report was prepared on the basis of a gait analysis that was carried out as part of the research project: “Individual multidisciplinary intervention”. The report is prepared in English, but also includes a short summary in Danish containing the most important findings (*this section has been removed*).

### The report describes:

- Body functions and structure impairments that are believed to affect walking.
- The elements of the child's gait (Features), where the movement pattern differs from the movement pattern in children without disabilities. The elements are documented as deviations in the course of the curve over movements of the pelvis, hip, knee and ankle.
- Additional information used in the interpretation of the survey results (e.g. physical examination, functional test and questionnaires).

### Multidisciplinary recommendations

The recommendations have been made based on a review of the report on xx-xx-xxxx by an interdisciplinary team:

The multidisciplinary team consisted of:

- Chief Physician, Clinical Associate Professor XXXXXXXXX, Orthopedic Surgery Department, Odense University Hospital
- Chief Physician, XXXXXXXXX, H.C. Andersen Children's Hospital
- Associate Professor, XXXXXXXXX, Orthopedic Surgery Research Unit, Odense University Hospital and University of Southern Denmark
- Physiotherapist, Ph.D. student XXXXXXXXX, Orthopedic Surgery Research Unit, Odense University Hospital and University of Southern Denmark

The recommendations describe which functional impairments affect the child's gait pattern and what interventions that the child, parents and health professionals should consider.

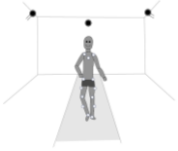

|            |            |
|------------|------------|
| Projekt ID | xxx        |
| Dato       | xx-xx-xxxx |

## Patient

|          |                           |       |    |      |            |
|----------|---------------------------|-------|----|------|------------|
| Name     | xxx                       | Age   | x  | Date | xx-xx-xxxx |
| Diagnose | Unilateral CP, right side | GMFCS | II | FMS  | 5 – 5 – 5  |

## Findings

### Detailed description

The study on xx-xx-xxxx in the Gait Analysis Laboratory shows that the gait pattern, i.e. the way the child moves his/her joints in the legs during walking is affected by the following:

- Reduced joint mobility in the right knee, which is not fully extended.
- Reduced muscle strength around the right ankle
- Reduced joint movement in right foot lift (dorsal flexion)
- Leg length difference (measured at x cm for the study)

Furthermore, the examination shows that when the child walks with drop foot brace / orthotics, gait is more secure and faster. The child walks with heel strike on both feet.

The child attends CPOP controls at the XXX Hospital.

A right convex scoliosis has been observed.

## Intervention recommendations

### Interventions based on the observed functional impairments

Based on the findings of the gait study, the following actions are recommended:

#### *Reduced joint mobility in right knee and leg length difference*

- Orthopedic surgical assessment of efforts to improve joint mobility of the right knee joint, and assessment of the leg length difference.

#### *Reduced strength around the right ankle joint*

- Exercises to improve muscle function in lifting the forefoot (dorsal flexion) and heel lift (plantar flexion) on the right leg so as to improve lifting of the forefoot in the swing phase and at foot contact during walking.
- Continuous use of the drop foot brace/orthotics.

#### *Reduced joint movement in the right foot lift*

- Exercise efforts to maintain muscle length around the right ankle, so as to maintain current joint mobility

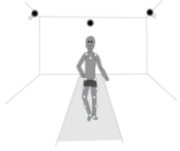

|            |            |
|------------|------------|
| Projekt ID | xxx        |
| Dato       | xx-xx-xxxx |

## Detailed description for health professionals

### Interventions based on the observed functional impairments

Based on the findings of the gait study, the following actions are recommended:

#### *Reduced joint mobility in right knee and leg length difference*

- Orthopedic surgical assessment of efforts to maintain and improve joint mobility of the right knee joint, as well as assessment of leg length discrepancy (note, the child has a right convex lumbar scoliosis).
- At the interdisciplinary conference various operations were discussed, but it is agreed that a precise recommendation must depend on the clinical examination and possibly supplementary examinations. The orthopedic surgeon is asked to make a decision on the further plan, as well as inform the family of the need for further examinations and treatment options.

#### *Reduced strength around the right ankle joint*

- Exercises to improve muscle function in lifting the forefoot (dorsal flexion), with flexed hip and knee (as in the middle of the swing phase) as well as with a stretched knee (as at the end of the swing phase), where the right foot is held at an approx. 5-10 degree plantar flexion. The action should be primarily focused on concentric and isometric muscle strength in the tibialis anterior with the flexed and extended knee.
- Exercise efforts to improve muscle function in heel lift (plantar flexion) on the right leg to improve push-off. The training should have a special focus on plantar flexion with extended hip and knee, as at the end of the standing phase.

#### *Reduced joint movement in the right foot lift*

- Exercise efforts to maintain muscle length around the right ankle, so as to maintain current joint mobility
